# Supplementary material for: Using Search Trends to Analyze Web-Based Interest in Lower Urinary Tract Symptoms-Related Inquiries, Diagnoses, and Treatments in Mainland China: Infodemiology Study of Baidu Index Data
Source: PubMed Central journal article supplement (PMC8292938; doi:10.2196/27029), 2021-07-06
Supplement: jmir_v23i7e27029_app2.pdf [file jmir_v23i7e27029_app2.pdf]

## List of keywords used in composite search index

| Term and recommend translation in Chinese               | Available term in Search engine | English equivalent terms                                     | Code  |
|---------------------------------------------------------|---------------------------------|--------------------------------------------------------------|-------|
| Weak stream<br>尿流缓慢                                     | 尿无力                             | Weak urination when peeing                                   | Term1 |
|                                                         | 小便无力                            | Weak in urine voiding                                        | Term2 |
|                                                         | 排尿无力                            | Weak in voiding urination                                    | Term3 |
| Split stream<br>尿流分叉或喷洒状尿流<br>(描述性症状)                   | 小便分叉                            | Split stream in voiding                                      | Term1 |
|                                                         | 尿分叉                             | Split stream when peeing                                     | Term2 |
|                                                         | 尿分叉是怎么回事                        | What is with the split stream                                | Term3 |
|                                                         | 尿尿分叉                            | Wee Wee split                                                | Term4 |
| Intermittency<br>间歇性尿流(尿流间歇)                            | NA                              |                                                              |       |
| Hesitancy<br>排尿踌躇                                       | 尿等待                             | Waiting before peeing                                        | Term1 |
| Straining<br>用力排尿                                       | NA                              |                                                              |       |
| Terminal dribble<br>终末滴沥                                | NA                              |                                                              |       |
| Perceived frequency<br>日间排尿次数增加                         | 尿频                              | Urinary frequency                                            | Term1 |
|                                                         | 尿频是什么原因                         | The cause for urinary frequency                              | Term2 |
|                                                         | 尿频的原因                           | Urinary frequency's cause                                    | Term3 |
|                                                         | 尿频是什么原因导致的                      | What causes urinary frequency                                | Term4 |
|                                                         | 尿频是怎么回事                         | What is with urinary frequency                               | Term5 |
|                                                         | 尿频吃什么药                          | What medicine should take to treat urinary frequently        | Term6 |
|                                                         | 尿频怎么办                           | What to do with urinary frequency                            | Term7 |
|                                                         | 尿频尿急                            | Urinary frequency with urgency                               | Term8 |
|                                                         | 尿频尿急是怎么回事                       | What is urinary frequency with urgency                       | Term9 |
| Nocturia<br>夜尿                                          | 夜尿增多                            | Night urination increase                                     | Term1 |
|                                                         | 夜尿多                             | Increased night urination                                    | Term2 |
|                                                         | 夜尿                              | (Increased) night urination                                  | Term3 |
|                                                         | 夜尿多是怎么回事                        | What is with increased night urination                       | Term4 |
|                                                         | 夜尿多吃什么药                         | What medicine should take to treat increased night urination | Term5 |
| Urgency<br>尿急                                           | 尿急                              | Urinary urgency                                              | Term1 |
|                                                         | 尿急是怎么回事                         | What is with urinary urgency                                 | Term2 |
|                                                         | 尿急怎么办                           | What to do with urinary urgency                              | Term3 |
|                                                         | 尿急吃什么药                          | What medicine to take                                        | Term4 |
|                                                         | 尿急尿频尿痛                          | Urinary urgency with frequency and voiding pain              | Term5 |
|                                                         | 尿急尿频尿不尽                         | Urinary urgency with frequency and                           | Term6 |
| Incontinence<br>尿失禁                                     | 尿失禁                             | Urinary incontinence                                         | Term1 |
|                                                         | 尿失禁的治疗方法                        | Treatment for urinary incontinence                           | Term2 |
|                                                         | 尿失禁的护理                          | Nursery for urinary incontinence                             | Term3 |
| Stress incont. (laughing, sneezing, coughing)<br>压力性尿失禁 | 压力性尿失禁                          | Stress incontinence                                          | Term4 |
| Urgency incont. (with fear of leaking)<br>急迫性尿失禁        | 急迫性尿失禁                          | Urgency incontinence                                         | Term5 |
| Stress incont. (physical activities)<br>混合性尿失禁          | NA                              |                                                              |       |
| Leak for no reason<br>持续性尿失禁                            | NA                              |                                                              |       |
| Post-micturition incontinence                           | NA                              |                                                              |       |

|                                              |          |                                          |       |
|----------------------------------------------|----------|------------------------------------------|-------|
| 排尿后尿失禁                                       |          |                                          |       |
| Leak during sexual activity<br>(Conditional) | NA       |                                          |       |
| 其他类型的尿失禁                                     |          |                                          |       |
| Nocturnal enuresis<br>遗尿                     | 遗尿       | Nocturnal enuresis                       | Term1 |
| Incomplete emptying<br>未排空感                  | 尿不尽      | Incomplete urinary emptying              | Term1 |
|                                              | 尿不尽症状    | Symptoms of incomplete urinary emptying  | Term2 |
|                                              | 尿不尽是怎么回事 | What is with incomplete urinary emptying | Term3 |
| Dysuria<br>排尿困难                              | 排尿困难     | Difficult urination                      | Term1 |
|                                              | 女性排尿困难   | Female difficult urination               | Term2 |
| Voidingpain<br>排尿疼痛                          | 尿痛       | Urinary pain                             | Term1 |
|                                              | 尿痛是怎么回事  | What is with urinary pain                | Term2 |
|                                              | 尿痛是什么原因  | What is the cause for urinary pain       | Term3 |
|                                              | 尿痛怎么办    | What to do with urinary pain             | Term4 |
|                                              | 尿痛吃什么药   | What medicine to take with urinary pain  | Term5 |
