# Supplementary material for: Using Search Trends to Analyze Web-Based Interest in Lower Urinary Tract Symptoms-Related Inquiries, Diagnoses, and Treatments in Mainland China: Infodemiology Study of Baidu Index Data
Source: PubMed Central journal article supplement (PMC8292938; doi:10.2196/27029), 2021-07-06
Supplement: jmir_v23i7e27029_app3.pdf [file jmir_v23i7e27029_app3.pdf]

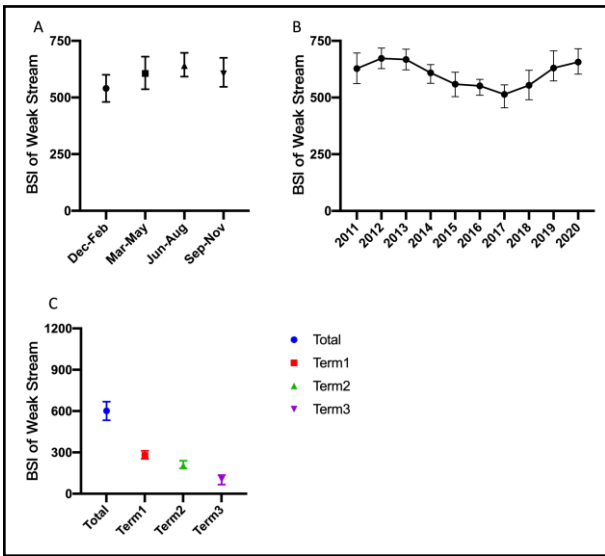

**Weak stream**

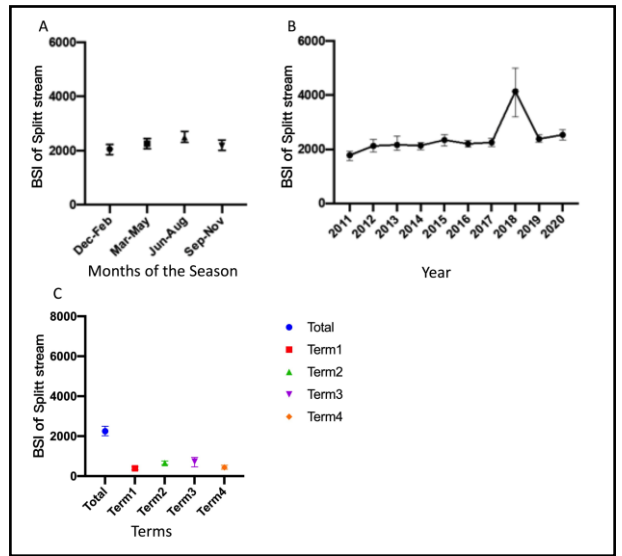

**Split stream**

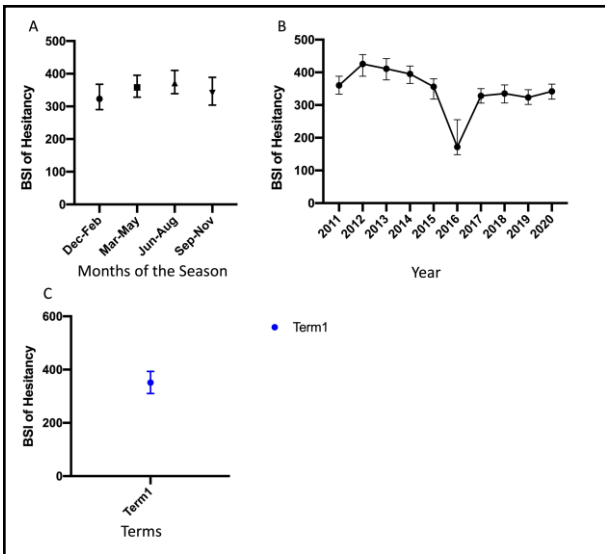

**Hesitancy**

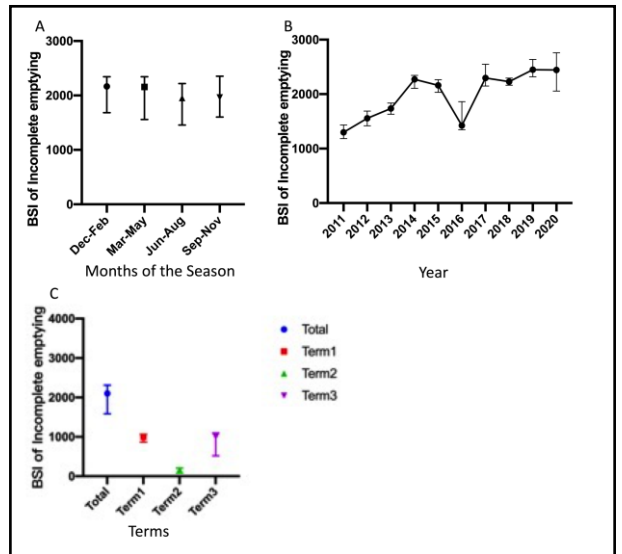

**Incomplete emptying**

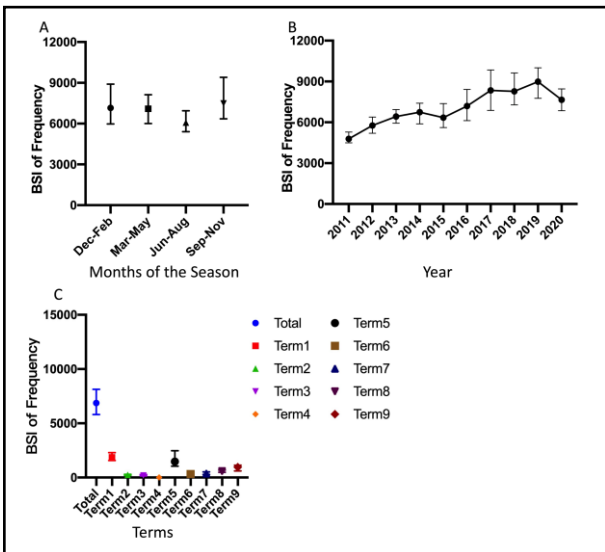

**Frequency**

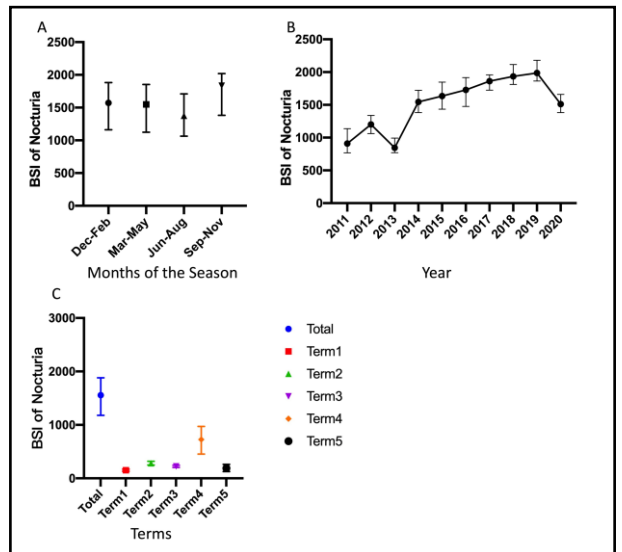

**Nocturia**

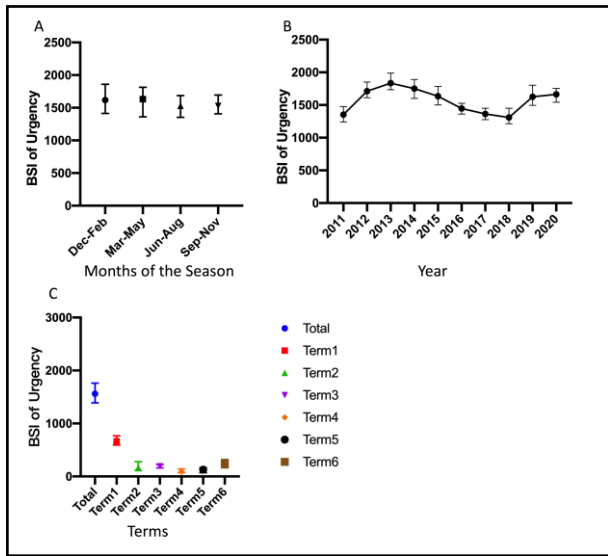

**Urgency**

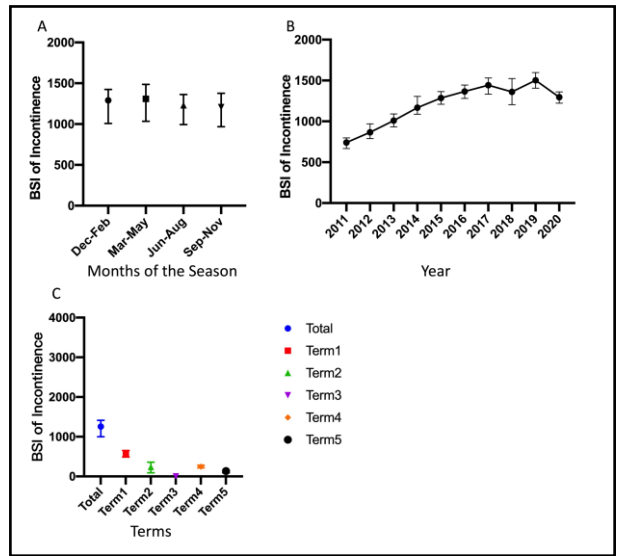

**Incontinence**

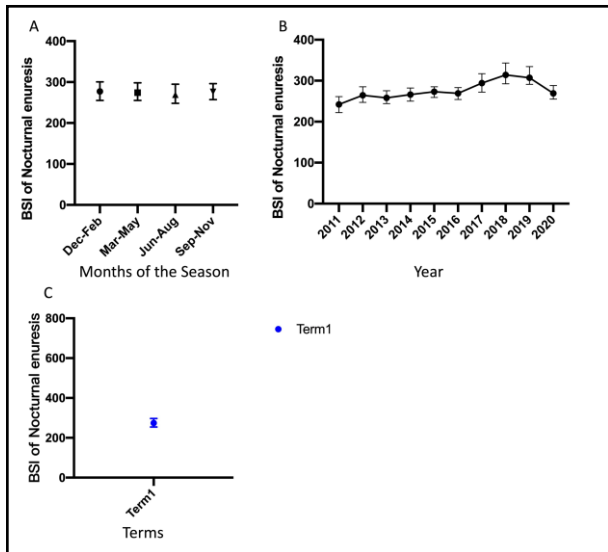

**Nocturnal enuresis**

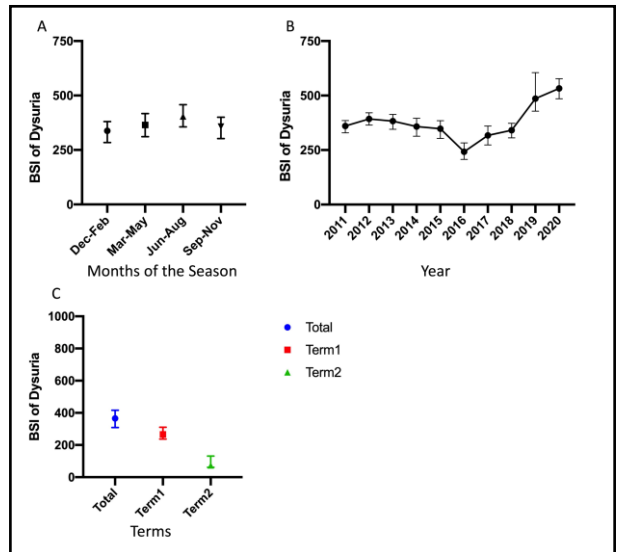

**Dysuria**

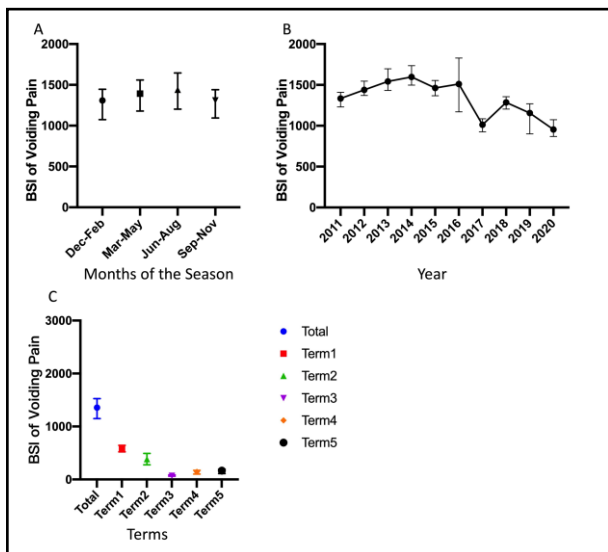

**Voiding Pain**

**Supplimentary appendix 2.** Web-based interest in LUTS domains over the last 10 years:

**A:** Median search volumes with IQRs for each term. **B:** Total BSI value (median [IQR]) for each season. **C:** Annual trend of the total BSI. **BSI:** Baidu search index; **LUTS:** lower urinary tract symptoms.
