# Supplementary material for: Using Search Trends to Analyze Web-Based Interest in Lower Urinary Tract Symptoms-Related Inquiries, Diagnoses, and Treatments in Mainland China: Infodemiology Study of Baidu Index Data
Source: PubMed Central journal article supplement (PMC8292938; doi:10.2196/27029), 2021-07-06
Supplement: jmir_v23i7e27029_app5.pdf [file jmir_v23i7e27029_app5.pdf]

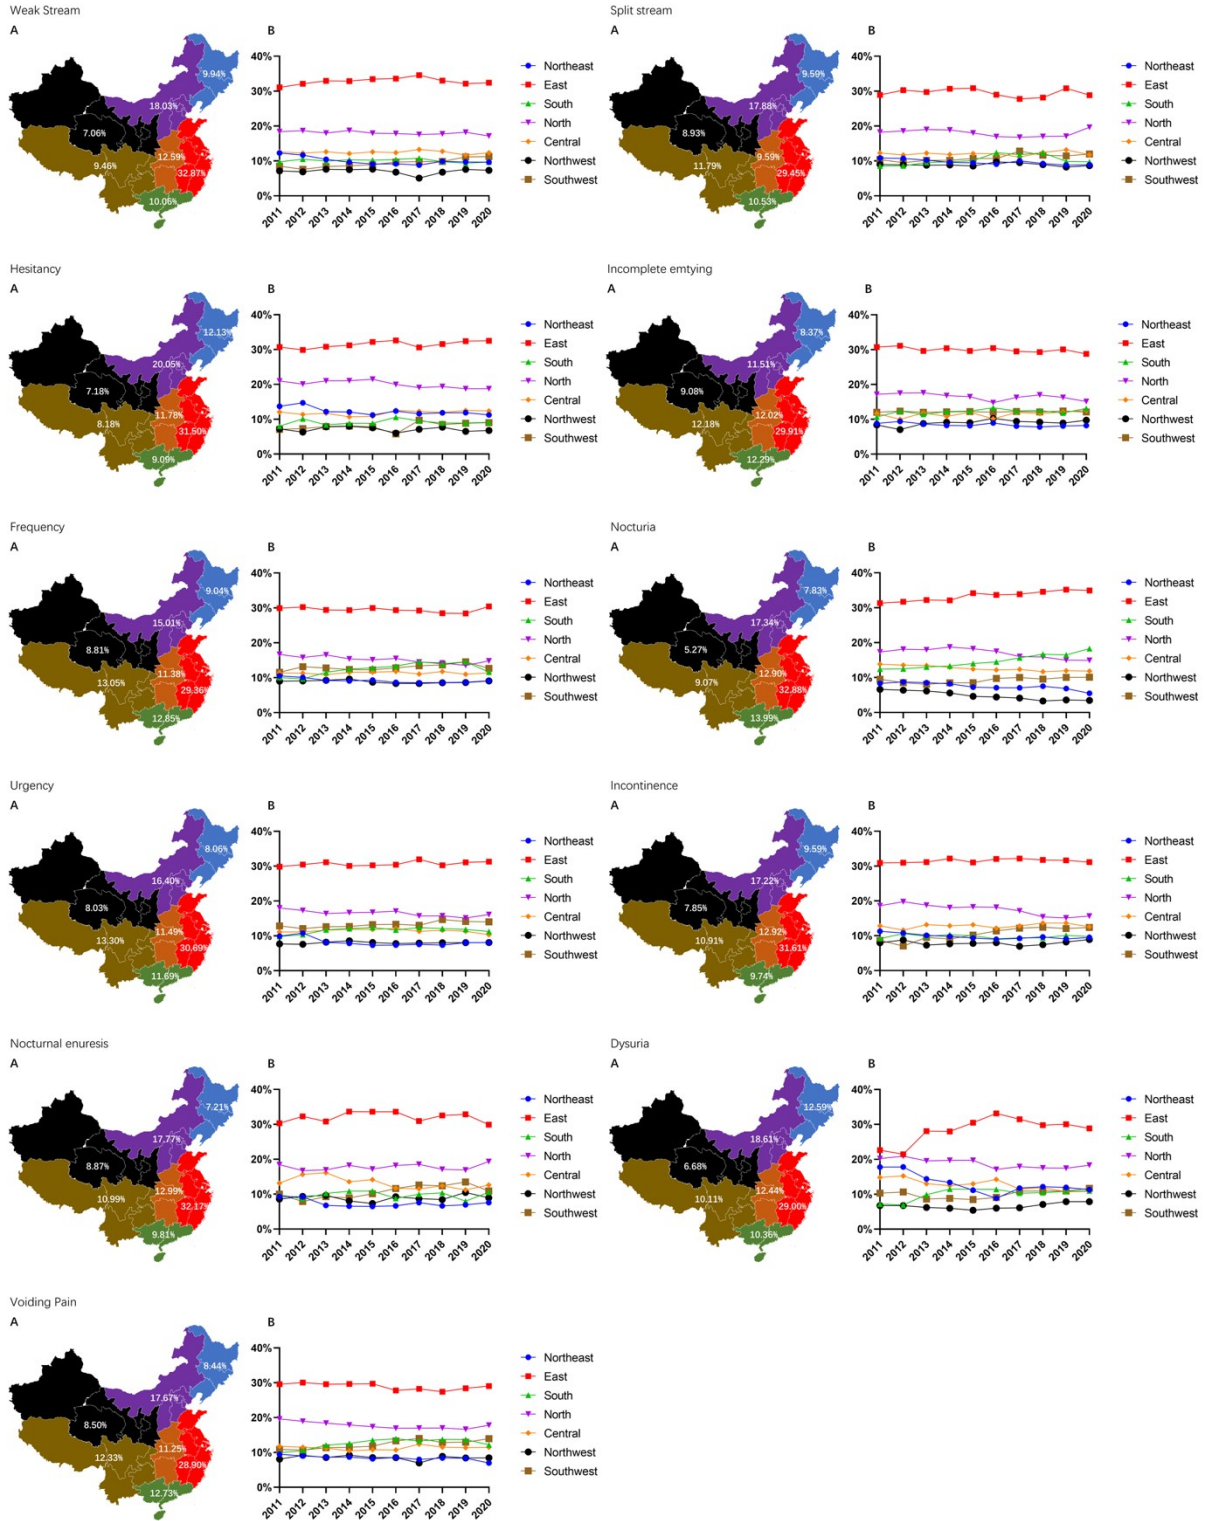

**Regional distribution of online interest in each LUTS domain over the last 10 years.**  
A: Regional rates for each area. B: Annual trend of the BSI for each region.
