# Supplementary material for: Using Search Trends to Analyze Web-Based Interest in Lower Urinary Tract Symptoms-Related Inquiries, Diagnoses, and Treatments in Mainland China: Infodemiology Study of Baidu Index Data
Source: PubMed Central journal article supplement (PMC8292938; doi:10.2196/27029), 2021-07-06
Supplement: jmir_v23i7e27029_app6.pdf [file jmir_v23i7e27029_app6.pdf]

| Domain/Category | Term1                                     | BSI                        | Term2                                      | BSI                                       | Term3                           | BSI                                       |         |
|-----------------|-------------------------------------------|----------------------------|--------------------------------------------|-------------------------------------------|---------------------------------|-------------------------------------------|---------|
| Weak Stream     | 1                                         | 尿不尽                        | 666,924                                    | 尿分叉                                       | 410,682                         | 尿频尿急尿不尽                                   | 408,274 |
|                 |                                           | incomplete emptying        |                                            | urine split                               |                                 | frequency urgency and incomplete urine    |         |
|                 | 2                                         | 尿不尽是怎么回事                   | 860,814                                    | 尿分叉是怎么回事                                  | 185,294                         | 尿频尿急尿不尽是什么原因造成的                           | 153,316 |
|                 |                                           | Why is incomplete emptying |                                            | Why is urine split                        |                                 | What causes frequency urgency incomplete  |         |
|                 | 3                                         | 前列腺增生怎么治疗                  | 60,576                                     | 前列腺炎吃什么药                                  | 57,144                          | 前列腺炎吃什么药最好                                | 46,172  |
|                 |                                           | How to treat BPH           |                                            | What medicine to take to cure prostatitis |                                 | What is the best medicine for prostatitis |         |
|                 | 4                                         | 利尿的食物                      | 14,508                                     | 我的身体有 BUG                                 | 7,308                           | 小便                                        | 7,240   |
|                 |                                           | Diuretic food              |                                            | I have physical BUGs                      |                                 | Urine                                     |         |
|                 | 5                                         | 前列腺炎                       | 1,500,686                                  | 膀胱炎                                       | 86,428                          | 尿路感染                                      | 41,660  |
|                 |                                           | Prostatitis                |                                            | Cystitis                                  |                                 | UTI                                       |         |
|                 | 6                                         | 郑州颐和医院                     | 3,522                                      | 泰州市人民医院                                   | 2,558                           | 博爱医院是正规医院吗                                | 2,478   |
|                 |                                           | Yihe hospital of zhengzhou |                                            | City people hospital of Taizhou           |                                 | Is the bo'ai hospital legal?              |         |
| 7               | 前列腺炎有什么症状                                 | 831,882                    | 前列腺增生的症状                                   | 104,442                                   | 前列腺炎症状                          | 12,976                                    |         |
|                 | What are the symptoms of prostatitis?     |                            | What are the symptoms of BPH?              |                                           | Symptoms of prostatitis         |                                           |         |
| 8               | 前列腺炎一杯水自测                                 | 24,688                     | 前列腺检查                                      | 5,260                                     | 前列腺液检查                          | 5,046                                     |         |
|                 | Testing prostatitis with one cup of water |                            | Prostatitis test                           |                                           | Prostatitis fluid test          |                                           |         |
| 9               | 前列腺炎能彻底治愈吗                                | 21,728                     | 前列腺炎会自愈吗                                   | 2,808                                     | 前列腺炎能根治吗                        | 1,600                                     |         |
|                 | Is prostatitis completely curable?        |                            | Is prostatitis self-healing                |                                           | Is prostatitis curable?         |                                           |         |
| 10              | 肾气不足                                      | 8,026                      | 肾气虚                                        | 5,854                                     | 湿热体质                            | 2,584                                     |         |
|                 | The insufficient Qi of the Shen (Kidney)  |                            | Qi deficiency of the Shen (Kidney)         |                                           | damp heat constitution          |                                           |         |
| 11              | 湿热症状                                      | 844                        |                                            |                                           |                                 |                                           |         |
|                 | Symptoms of damp heat constitution        |                            |                                            |                                           |                                 |                                           |         |
| 12              | 知柏地黄丸                                     | 2,104                      |                                            |                                           |                                 |                                           |         |
|                 | phellodendron and rehmannia bolus         |                            |                                            |                                           |                                 |                                           |         |
| Split           | 1                                         | 尿不尽                        | 1,131,818                                  | 小便刺痛                                      | 912,462                         | 尿分叉                                       | 839,362 |
|                 |                                           | Incomplete emptying        |                                            | Stabbing pain urination                   |                                 | Urinary split                             |         |
|                 | 2                                         | 尿不尽是怎么回事                   | 1,311,604                                  | 尿液特别黄是怎么回事                                | 499,600                         | 尿分叉是怎么回事                                  | 472,792 |
|                 |                                           | Why is incomplete emptying |                                            | Why is urine yellow                       |                                 | Why is urinary split?                     |         |
| 3               | 前列腺炎吃什么药                                  | 1,675,072                  | “矮阳”怎么恢复                                   | 1,573,308                                 | 怎么锻炼治早泄                         | 489,278                                   |         |
|                 | What's the medication                     |                            | How to recover from "Erectile dysfunction" |                                           | How to cure PE by training      |                                           |         |
| 4               | 什么是前列腺前列腺在哪                               | 677,140                    | 前列腺                                        | 489,094                                   | “包头”过长手术“包头”过长                  | 386,558                                   |         |
|                 | What and where is the prostate            |                            | Prostate                                   |                                           | Surgery for redundant "prepuce" |                                           |         |

|           |                                           |            |                                                                     |          |                                                  |            |        |
|-----------|-------------------------------------------|------------|---------------------------------------------------------------------|----------|--------------------------------------------------|------------|--------|
| 5         | 前列腺炎                                      | 6,086,456  | 包头过长                                                                | 87,778   | 尿道狭窄                                             | 49,388     |        |
|           | Prostatitis                               |            | Redundant prepuce                                                   |          | urethral stricture                               |            |        |
| 6         | 老虎油                                       | 11,744     | 男性医院                                                                | 4,428    | 德胜门中医院                                           | 3,408      |        |
|           | Tiger balm                                |            | Andrology Hospital                                                  |          | TCM hospital of Desheng gate                     |            |        |
| 7         | 前列腺炎有什么症状                                 | 26,683,978 | 前列腺增生的症状                                                            | 367,976  | 尿道炎症状表现                                          | 66,268     |        |
|           | What are the symptoms of prostatitis?     |            | What are the symptoms of BPH?                                       |          | What are the symptoms of urethritis?             |            |        |
| 8         | 前列腺炎一杯水自测                                 | 2,288,702  | 前列腺按摩                                                               | 458,324  | 男人常规检查                                           | 283,486    |        |
|           | Testing prostatitis with one cup of water |            | Prostate massage                                                    |          | Routine exam for males' (problem)                |            |        |
| 9         | 前列腺年轻人会自愈吗                                | 1,126,664  | 长期过度手淫多久恢复                                                          | 429,106  | 前列腺炎有什么症状和危害性                                    | 159,116    |        |
|           | Is prostatitis self-healing               |            | How long it takes to recover after long-term excessive masturbating |          | What are the symptoms and damages of prostatitis |            |        |
| 10        | 肾亏                                        | 60,744     |                                                                     |          |                                                  |            |        |
|           | Asthenia of Kidney-Yin                    |            |                                                                     |          |                                                  |            |        |
| 11        | 阳虚症状                                      | 3,898      | 脚心发热是怎么回事                                                           | 1,664    | 肾阴虚症状                                            | 1,406      |        |
|           | Yang deficiency symptoms                  |            | why is the heat of the foot arch                                    |          | Symptom of kidney-yin deficiency                 |            |        |
| 12        | 穿山甲粉                                      | 1,832      | 枸杞有什么作用                                                             | 1,416    | 陈皮的作用与功效                                         | 294        |        |
|           | Pangolin powder                           |            | What is the medication effect of goji berry                         |          | Medication effect of tangerine peel              |            |        |
| Hesitancy | 尿频                                        | 819,376    | 尿不尽                                                                 | 620,294  | 尿急                                               | 433,758    |        |
|           | Urinary frequency                         |            | Incomplete emptying                                                 |          | Urinary urgency                                  |            |        |
|           | 尿不尽是怎么回事                                  | 131,044    | 尿分叉是怎么回事                                                            | 71,902   | 尿滴白是什么原因                                         | 2,950      |        |
|           | Why is urinary frequency                  |            | Why is split stream                                                 |          | What cause the terminal white dribbling          |            |        |
|           | 前列康                                       | 51,856     | 前列腺增生怎么治疗                                                           | 20,336   | 保列治                                              | 19,762     |        |
|           | Prostate Plus                             |            | How to cure BPH                                                     |          | Proscar                                          |            |        |
|           | 前列腺                                       | 155,796    | 括约肌                                                                 | 9,802    | 久坐的危害                                            | 7,876      |        |
|           | Prostate                                  |            | Sphincter                                                           |          | risks of being seated for too long               |            |        |
|           | 前列腺炎                                      | 3,658,210  | 前列腺癌                                                                | 99,886   | 膀胱炎                                              | 47,090     |        |
|           | Prostatitis                               |            | Prostate cancer                                                     |          | Cystitis                                         |            |        |
|           | 南京同仁医院                                    | 3,428      | 武汉中医院                                                               | 1,550    | 益阳市中心医院                                          | 1,530      |        |
|           | Tongren hospital, Nanjing                 |            | TCM hospital,Wuhan                                                  |          | Central hospital,Yiyang                          |            |        |
|           | 前列腺炎有什么症状                                 | 8,303,102  | 前列腺增生的症状                                                            | 191,756  | 前列腺炎症状                                           | 79,432     |        |
|           | What are symptoms of the prostatitis      |            | Symptoms of BPH                                                     |          | Symptoms of prostatitis                          |            |        |
|           | 前列腺炎一杯水自测                                 | 484,170    | 前列腺液                                                                | 14,900   | 前列腺按摩                                            | 14,528     |        |
|           | Testing prostatitis with one cup of water |            |                                                                     |          |                                                  |            |        |
|           | 9                                         | 前列腺年轻人会自愈吗 | 173,586                                                             | 前列腺炎会自愈吗 | 76,674                                           | 前列腺炎能彻底治愈吗 | 30,292 |

|                     |                                                        |                                           |                                                                   |                                       |
|---------------------|--------------------------------------------------------|-------------------------------------------|-------------------------------------------------------------------|---------------------------------------|
|                     |                                                        | Is prostatitis self-healing in young men  | Is prostatitis self-healing                                       | Is prostatitis complete curable?      |
| 10                  | 肾透支                                                    | 978                                       |                                                                   |                                       |
|                     |                                                        | renal physically overdraft exhausted      |                                                                   |                                       |
| 11                  | 肾气不足的症状                                                | 10,268                                    |                                                                   |                                       |
|                     |                                                        | Symptoms of kidney deficiency             |                                                                   |                                       |
| 12                  | 葛根                                                     | 310                                       |                                                                   |                                       |
|                     |                                                        | The root of kudzu vine                    |                                                                   |                                       |
| Incomplete Emptying | 1                                                      | 尿频                                        | 尿不尽                                                               | 尿频尿急尿不尽                               |
|                     |                                                        | 3,014,686                                 | 1,289,546                                                         | 1,020,910                             |
|                     |                                                        | Urinary frequency                         | Incomplete emptying                                               | Frequency,urgency,incomplete emptying |
| 2                   | 尿频是怎么回事                                                | 6,751,142                                 | 尿频尿急是怎么回事                                                         | 尿不尽是怎么回事                              |
|                     |                                                        | 6,620,776                                 | 6,620,776                                                         | 1,878,530                             |
|                     |                                                        | Why is frequency                          | Why is frequency and urgency                                      | Why is incomplete emptying            |
| 3                   | 前列腺炎吃什么药                                               | 1,785,180                                 | 尿路感染吃什么药                                                          | 三金片的功效与作用                             |
|                     |                                                        | 1,475,304                                 | 1,475,304                                                         | 1,102,312                             |
|                     |                                                        | What medication to take for prostatitis   | What medication to take for UTI                                   | Efficacy of Sanjin tables             |
| 4                   | 前列腺                                                    | 393,966                                   | 人体正常体温是多少度                                                        | 憋尿                                    |
|                     |                                                        | 393,966                                   | 148,190                                                           | 59,120                                |
|                     |                                                        | Prostatitis                               | What is the normal temperature of Human                           | Suppresses the urine                  |
| 5                   | 前列腺炎                                                   | 6,083,440                                 | 尿路感染                                                              | 膀胱炎                                   |
|                     |                                                        | 6,083,440                                 | 932,908                                                           | 394,938                               |
|                     |                                                        | Prostatitis                               | UTI                                                               | Cystitis                              |
| 6                   | 问医生                                                    | 83,958                                    | 好大夫在线                                                             | 拇指医生                                  |
|                     |                                                        | 83,958                                    | 74,466                                                            | 6,130                                 |
|                     |                                                        | Ask Doctor.com                            | Good doctor.com                                                   | Dr thumb.com                          |
| 7                   | 前列腺炎有什么症状                                              | 22,680,122                                | 尿毒症早期症状                                                           | 尿道炎症状表现                               |
|                     |                                                        | 22,680,122                                | 3,816,456                                                         | 1,545,902                             |
|                     |                                                        | What are the symptoms of prostatitis      | What are the early symptoms of uremia                             | Symptom of urinary tract inflammation |
| 8                   | 前列腺炎一杯水自测                                              | 699,184                                   | 自己按摩前列腺十种手法图解                                                     | 妇科检查                                  |
|                     |                                                        | 699,184                                   | 114,014                                                           | 15,334                                |
|                     |                                                        | Testing prostatitis with one cup of water | Demonstration by illustration,10 ways of DIY prostate examination | Gynecologic examination               |
| 9                   | 前列腺炎能彻底治愈吗                                             | 772,360                                   | 女性尿道感染能自愈吗                                                        | 早些泄能治好吗                               |
|                     |                                                        | 772,360                                   | 378,462                                                           | 88,816                                |
|                     |                                                        | Is prostatitis complete curable?          | Is female UTI self-healing?                                       | Is premature ejaculation curable?     |
| 10                  | 肾虚                                                     | 41,756                                    | 阴虚                                                                | 阳虚                                    |
|                     |                                                        | 41,756                                    | 19,200                                                            | 13,436                                |
|                     |                                                        | deficiency of kidney energy               | deficiency of YIN (negative)                                      | deficiency of YANG (positive)         |
|                     |                                                        | 阴虚和阳虚最简单辨别                                | 肾阴虚和肾阳虚的区别                                                        | 肾阴虚的症状                                |
|                     |                                                        | 133,548                                   | 70,654                                                            | 39,842                                |
| 11                  | Simplest way in distinguish deficiency of YIN and YANG |                                           | Distinguish the deficiency of kidney YIN and YANG                 | Symptom of YIN deficiency of kidney   |
| 12                  | 知柏地黄丸                                                  | 39,206                                    |                                                                   |                                       |

| phellodendron and rehmannia bolus |                                           |                          |                                           |                                                                 |                                                                     |                                           |           |
|-----------------------------------|-------------------------------------------|--------------------------|-------------------------------------------|-----------------------------------------------------------------|---------------------------------------------------------------------|-------------------------------------------|-----------|
| Frequency                         | 1                                         | 尿频                       | 7,003,756                                 | 女性尿完一会儿又想尿                                                      | 2,747,294                                                           | 尿频尿急尿不尽                                   | 2,251,042 |
|                                   |                                           | Urinary Frequency        |                                           | Women want to pee just after urinating                          |                                                                     | Freuqency,Urgency and incomplete emptying |           |
|                                   | 2                                         | 尿频是怎么回事                  | 17,391,286                                | 尿频尿急是怎么回事                                                       | 3,060,924                                                           | 尿路感染是怎么引起的                                | 2,627,612 |
|                                   |                                           | Why is urinary frequency |                                           | Why is frequency and urgency                                    |                                                                     | How is UTI caused                         |           |
|                                   | 3                                         | 三金片的功效与作用                | 7,772,934                                 | 尿路感染吃什么药                                                        | 5,198,314                                                           | 左氧氟沙星                                     | 4,053,408 |
|                                   |                                           | Efficacy of Sanjin pill  |                                           | What medicine to take with UTI                                  |                                                                     | Levofloxacin                              |           |
|                                   | 4                                         | 前列腺                      | 492,858                                   | 人体器官结构五脏六腑肾位置                                                   | 186,472                                                             | 肚子里咕噜咕噜响是怎么回事                             | 164,050   |
|                                   |                                           | Prostatitis              |                                           | Anatomic location of the five viscera and six entrails in human |                                                                     | What is rumble in the stomach             |           |
|                                   | 5                                         | 前列腺炎                     | 6,500,962                                 | 尿路感染                                                            | 4,353,686                                                           | 糖尿病                                       | 1,997,930 |
|                                   |                                           | Prostatitis              |                                           | UTI                                                             |                                                                     | Diabetes                                  |           |
|                                   | 6                                         | 好大夫                      | 70,970                                    | 心理医生                                                            | 35,494                                                              | 广东省人民医院                                   | 33,788    |
|                                   |                                           | Good doctors.com         |                                           | Psychiatrist.com                                                |                                                                     | Guangdong provincial hospital             |           |
| 7                                 | 前列腺炎有什么症状                                 | 24,580,186               | 糖尿病的早期症状                                  | 9,532,584                                                       | 尿毒症早期症状                                                             | 5,689,434                                 |           |
|                                   | What are the symptoms of prostatitis      |                          | Early symptoms of diabetes mellitus       |                                                                 | Early symptoms of uremia                                            |                                           |           |
| 8                                 | 前列腺炎一杯水自测                                 | 248,938                  | 尿常规                                       | 88,818                                                          | 验孕棒怎么用                                                              | 69,336                                    |           |
|                                   | Testing prostatitis with one cup of water |                          | Routine urinary test                      |                                                                 | How to use the pregnancy test stick                                 |                                           |           |
| 9                                 | 女性尿道感染能自愈吗                                | 1,025,440                | 前列腺炎能彻底治愈吗                                | 324,842                                                         | 阳痿会自己恢复吗                                                            | 90,596                                    |           |
|                                   | Is female UTI self-healing?               |                          | Is prostatitis complete curable?          |                                                                 | Is impotence self-healing?                                          |                                           |           |
| 10                                | 肾虚                                        | 264,352                  | 肾阳虚                                       | 30,162                                                          | 气血不足                                                                | 27,978                                    |           |
|                                   | Deficiency of kidney energy               |                          | deficiency of kidney Yang                 |                                                                 | deficiency of Qi and blood                                          |                                           |           |
| 11                                | 肾虚的表现                                     | 2,964,302                | 脾虚的症状                                     | 138,500                                                         | 肾阴虚和肾阳虚的区别                                                          | 104,914                                   |           |
|                                   | Manifestation of kidney energy deficiency |                          | Manifestation of Spleen energy deficiency |                                                                 | Difference of kidney energy deficiency with essence of Yin and Yang |                                           |           |
| 12                                | 桂圆的功效与作用                                  | 99,762                   | 葛根                                        | 79,870                                                          | 夏枯草的功效与作用                                                           | 78,344                                    |           |
|                                   | Efficacy of longan                        |                          | The root of kudzu vine                    |                                                                 | Efficacy of prunella vulgaris                                       |                                           |           |
| Urgency                           | 1                                         | 尿频                       | 2,107,120                                 | 尿不尽                                                             | 1,193,222                                                           | 憋尿                                        | 1,087,090 |
|                                   |                                           | Urinary frequency        |                                           | Incomplete                                                      |                                                                     | Suppresses the urine                      |           |
|                                   | 2                                         | 尿频是怎么回事                  | 4,112,752                                 | 尿路感染是怎么引起的                                                      | 1,162,970                                                           | 尿不尽是怎么回事                                  | 1,287,212 |
|                                   | Why is urinary frequency                  |                          | How is the UTI caused                     |                                                                 | Why is the incomplete urinate                                       |                                           |           |
| 3                                 | 三金片                                       | 3,904,594                | 尿路感染吃什么药                                  | 2,502,692                                                       | 六味地黄丸的功效与作用                                                         | 2,210,286                                 |           |

|    |         |                                                  |                                              |                                                         |  |
|----|---------|--------------------------------------------------|----------------------------------------------|---------------------------------------------------------|--|
|    |         | Sanjin pills                                     | What's the medication for UTI                | The efficacy of Liuwei Dihuang Pills                    |  |
| 4  |         | 女性生殖 1,376,070                                   | 前列腺 387,986                                  | 幽门螺旋杆菌 250,894                                          |  |
|    |         | Female reproduce                                 | Prostate                                     | Helicobacter pylori                                     |  |
| 5  |         | 前列腺炎 2,145,816                                   | 尿毒症 669,734                                  | 尿路感染 528,024                                            |  |
|    |         | Prostatitis                                      | Uremia                                       | UTI                                                     |  |
| 6  |         | 郑大一附院 21,930                                     | 丁香医生 20,476                                  | 春雨医生 113,24                                             |  |
|    |         | Fist affiliated hospital of Zhengzhou University | DXY.com                                      | Dr Chunyu.com                                           |  |
| 7  |         | 前列腺炎有什么症状 13,278,380                             | 尿毒症早期症状 2,824,338                            | 怀孕 10 天最明显的征兆 1,636,842                                 |  |
|    |         | What are the symptoms of prostatitis             | What are the early symptoms of Uremia        | Most significant signs of the first 10days of pregnancy |  |
| 8  |         | 前列腺炎一杯水自测 480,412                                | 尿常规能检查出什么 39,822                             | 体检项目有哪些 30,284                                          |  |
|    |         | Testing prostatitis with one cup of water        | What can be detected by routine urinary test | What the items in physical examination                  |  |
| 9  |         | 女性尿道感染能自愈吗 463,322                               | 前列腺炎能彻底治愈吗 430,102                           | 前列腺炎有什么症状和危害性 69,566                                    |  |
|    |         | Is female UTI self-healing                       | Is prostatitis completely curable?           | What are the symptoms and damages for prostatitis       |  |
| 10 |         | 肾虚 116,188                                       | 肾阳虚 42,292                                   |                                                         |  |
|    |         | Deficiency of kidney energy                      | Deficiency of kidney Yang energy             |                                                         |  |
| 11 |         | 肾阴虚表现 953,638                                    | 肾虚的表现 131,290                                | 阴虚和阳虚最简单辨别 118,494                                      |  |
|    |         | Manifestation of deficiency of kidney Yin energy | Manifestation of deficiency of kidney energy | Distinguishing from Yang deficiency and Yin deficiency  |  |
| 12 |         | 黄芪红枣茶 1,172,242                                  | 蒲公英茶的功效与作用 661,598                           | 车前草的功效与作用 248,128                                       |  |
|    |         | Jujube Huangqi tea                               | Dandelion Tea                                | The efficacy of plantain seed                           |  |
|    | Dysuria | 尿不尽 507,706                                      | 尿潴留 405,692                                  | 尿分叉 233,416                                             |  |
| 1  |         | Incomplete emptying                              | Urinary retention                            | Stream split                                            |  |
| 2  |         | 尿不尽是怎么回事 215,360                                 | 为什么尿不尽 57,052                                | 尿不尽是什么引起 27,396                                         |  |
|    |         | Why is incomplete emptying                       | Why is incomplete emptying                   | What caused incomplete emptying                         |  |
| 3  |         | 前列腺增生怎么治疗 336,008                                | 尿结石最快的排出方法 98,584                            | 前列腺炎的自我疗法 70,390                                        |  |
|    |         | How to treat BPH                                 | The most effective way to lithagogue         | DIY treatment of prostatitis                            |  |
| 4  |         | 尿 119,762                                        | 小便 34,704                                    | 利尿的食物 29,930                                            |  |
|    |         | Urinate                                          | Pee                                          | Diuretic food                                           |  |
| 5  |         | 前列腺炎 163,268                                     | 尿路结石 106,928                                 | 尿结石 73,062                                              |  |
|    |         | Prostatitis                                      | Lithangiuria                                 | Urolithiasis                                            |  |

|    |                                                 |           |                                           |         |                                          |         |
|----|-------------------------------------------------|-----------|-------------------------------------------|---------|------------------------------------------|---------|
| 6  | 宝鸡市中心医院                                         | 2,410     | 温岭市第一人民医院                                 | 1,602   | 内蒙古国际蒙医医院                                | 1,226   |
|    | Central hospital of Baoji City                  |           | First hospital of Wenling city            |         | International hospital of Inner-Mongolia |         |
| 7  | 前列腺增生的症状                                        | 731,558   | 尿结石的症状                                    | 88,710  | 膀胱炎有什么症状                                 | 51,954  |
|    | Symptoms of BPH                                 |           | Symptoms of Urolithiasis                  |         | Symptoms of cystitis                     |         |
| 8  | 前列腺炎一杯水自测                                       | 98,684    | 膀胱镜                                       | 7,056   | 直肠指检                                     | 1,626   |
|    | Testing prostatitis with one cup of water       |           | Cystoscope                                |         | Digital rectal examination               |         |
| 9  | 前列腺年轻人会自愈吗                                      | 17,406    | 尿结石严重吗                                    | 620     | 肾结石的危害                                   | 500     |
|    | Is prostatitis self-healing?                    |           | Is Urolithiasis leading sever consequence |         | Damage of urolithiasis                   |         |
| 10 | 膀胱经不通                                           | 220       |                                           |         |                                          |         |
|    | Obstruction of urinary Bladder lines            |           |                                           |         |                                          |         |
| 11 | 肾亏的症状                                           | 228       |                                           |         |                                          |         |
|    | Manifestation of kidney energy deficiency       |           |                                           |         |                                          |         |
| 12 | 葛根                                              | 70        |                                           |         |                                          |         |
|    | The root of kudzu vine                          |           |                                           |         |                                          |         |
| 1  | 遗精                                              | 1,314,062 | 尿失禁                                       | 469,544 | 尿不尽                                      | 446,866 |
|    | spermatorrhea                                   |           | Urinary incontinence                      |         | Incomplete emptying                      |         |
| 2  | 尿不尽是怎么回事                                        | 165,026   | 屁多是什么原因                                   | 55,582  | 遗精是什么原因引起的                               | 45,644  |
|    | Why is incomplete emptying                      |           | What caused farting too much              |         | What caused spermatorrhea                |         |
| 3  | 醒脾养儿颗粒                                          | 92,542    | 阿米替林                                      | 32,538  | 小儿推拿                                     | 22,000  |
|    | Feed spleen nourish kid particle                |           | Amitriptyline                             |         | Massage for kid                          |         |
| 4  | 泌尿外科                                            | 27,468    | 感统失调                                      | 20,416  | 母乳喂养多久最好                                 | 19,088  |
|    | Dep of Urology                                  |           | Sensory dys-integration                   |         | how long of breastfeeding is the best    |         |
| 5  | 多动症                                             | 236,148   | 尿崩症                                       | 192,550 | 脊柱裂                                      | 141,434 |
|    | attention deficit hyperactivity disorder (ADHD) |           | diabetes insipidus                        |         | spina bifida                             |         |
| 6  | 南京儿童医院                                          | 50,484    | 21 金维他                                    | 21,264  | 儿童医院                                     | 16,146  |
|    | Children's hospital Nanjing city                |           | 21 gold vitamines                         |         | Children's hospital                      |         |
| 7  | 多动症有哪些症状                                        | 95,164    | 尿道炎症状表现                                   | 48,944  | 多动症儿童的行为表现有哪些                            | 27,588  |
|    | Symptoms of ADHD                                |           | Symptoms of urinary tract inflammation    |         | Symptoms of ADHD in children             |         |
| 8  | 试纸                                              | 4,438     | 膀胱镜                                       | 2,996   | PPD 试验                                   | 2,096   |
|    | Test paper                                      |           | cystoscope                                |         | PDD test                                 |         |
| 9  | 糖尿病会遗传吗                                         | 4,334     | 糖尿病遗传吗                                    | 2,806   | 蛛网膜下腔出血后遗症                               | 1,036   |
|    | Can diabetes mellitus hereditary                |           | Is diabetes mellitus hereditary           |         | Sequelae of subarachnoid hemorrhage      |         |
| 10 | 肾气不足                                            | 8,626     | 痞积                                        | 7,406   | 肾气虚                                      | 5,842   |

|          |              |                                                        |               |                                                           |                          |                                                            |                             |         |
|----------|--------------|--------------------------------------------------------|---------------|-----------------------------------------------------------|--------------------------|------------------------------------------------------------|-----------------------------|---------|
|          |              | Kidney Qi deficiency<br>肾气不足的症状                        | 13,406        | infantile malnutrition<br>肾亏的症状有哪些                        | 12,398                   | Kidney Qi weak<br>脾肾阳虚的症状                                  | 6,996                       |         |
|          | 11           | Symptoms of kidney Qi deficiency                       |               | Symptoms of kidney weakness                               |                          | Symptoms of kidney Spleen Yang deficiency                  |                             |         |
|          | 12           | 山药<br>Chinese yam                                      | 54,210        | 分心木<br>Diaphragma juglandis                               | 14,940                   | 金樱子<br>Rosa laevigata                                      | 12,290                      |         |
| Nocturia | 1            | 尿频<br>Urinary frequency                                | 2,103,352     | 尿不尽<br>Incomplete emptying                                | 398,566                  | 尿多<br>Polyuria                                             | 264,042                     |         |
|          | 2            | 尿频是怎么回事<br>Why is urinary frequency                    | 606,1632      | 夜尿多是怎么回事<br>Why is nocturia                               | 1,388,138                | 尿频尿急是怎么回事<br>Why is frequency and urgency                  | 300,240                     |         |
|          | 3            | 六味地黄丸的功效与作用<br>Efficacy of Liuweidihuang pill          | 6,298,692     | 金匮肾气丸的功效与作用<br>Efficacy of kidney-qi-tonifying pill       | 3,779,026                | 三金片的功效与作用<br>Efficacy of Sanjin pill                       | 1,208,160                   |         |
|          | 4            | 芒果的功效与作用禁忌<br>Efficacy and taboo of mango              | 697,896       | 指甲上有竖纹是怎么回事<br>What is the sign of vertical grain on nail | 331,576                  | 前列腺钙化是什么意思<br>What is prostatic calcification              | 170,444                     |         |
|          | 5            | 前列腺炎<br>Prostatitis                                    | 1,069,872     | 尿毒症<br>Uremia                                             | 851,004                  | 肾炎<br>Nephritis                                            | 388,944                     |         |
|          | 6            | 好大夫在线<br>Good doctor.com                               | 78,668        | 健康之路<br>Health road.com                                   | 43,214                   | 郑大一附院<br>First affiliated hospital of Zhengzhou University | 25,124                      |         |
|          | 7            | 前列腺炎有什么症状<br>What are the symptoms of prostatitis      | 12,504,694    | 尿毒症早期症状<br>Early signs of uremia                          | 5,699,300                | 糖尿病的早期症状<br>Early signs of diabetes mellitus               | 3,621,064                   |         |
|          | 8            | 前列腺炎一杯水自测<br>Testing prostatitis with one cup of water | 242,412       | 肾功能检查项目<br>Testing items of renal function                | 109,974                  | 24 小时尿蛋白定量<br>24 hours urinary protein quantification      | 81,616                      |         |
|          | 9            | 女性尿道感染能自愈吗<br>Is female UTI self-curing                | 30,894        | 尿毒症能活多久<br>How long to survive with uremia                | 26,328                   | 前列腺炎会自愈吗<br>Is prostatitis self-curing                     | 25,442                      |         |
|          | 10           | 肾阳虚<br>Kidney deficiency                               | 273,698       | 肾虚<br>Kidney deficiency                                   | 177,190                  | 肾阴虚<br>Kidney Yin-deficiency                               | 73,646                      |         |
|          | 11           | 肾虚的表现<br>Manifestation Kidney deficiency               | 1,457,538     | 阴虚和阳虚最简单辨别<br>Distinguish from Yang-Yin-deficiency        | 366,450                  | 肾阴虚和肾阳虚的区别<br>kidney Yang-Yin-deficiency differences       | 355,376                     |         |
|          | 12           | 五苓散<br>Wuling powder                                   | 20,736        | 黄芪的功效与作用<br>Efficacy of Astragalus                        | 525,134                  | 桑葚的功效与作用<br>Efficacy of mulberries                         | 441,114                     |         |
|          | Incontinence | 1                                                      | 尿急<br>Urgency | 895,220                                                   | 尿潴留<br>Urinary retention | 630,182                                                    | 尿失禁<br>Urinary incontinence | 537,402 |
|          |              | 2                                                      | 女性漏尿是什么原因     | 202,706                                                   | 尿路感染是怎么引起的               | 172,708                                                    | 尿频是怎么回事                     | 107,608 |

|              |                                        |            |                                      |           |                                       |
|--------------|----------------------------------------|------------|--------------------------------------|-----------|---------------------------------------|
|              | Why is female urinary leakage          |            | What caused UTI                      |           | Why is urinary frequency              |
| 3            | 凯格尔运动                                  | 1,928,366  | 盆底肌修复                                | 139,300   | 米多君                                   |
|              | Kegel Exercise                         |            | Pelvic floor muscle repair           |           | Midodrine                             |
| 4            | 前列腺                                    | 152,898    | 膀胱                                   | 80,806    | 幽门螺杆菌                                 |
|              | Prostate                               |            | Bladder                              |           | Helicobacter pylori                   |
| 5            | 尿路感染                                   | 438,592    | 子宫脱垂                                 | 209,622   | 压力性尿失禁                                |
|              | UTI                                    |            | Uterus prolapse                      |           | Stress incontinence                   |
| 6            | 好大夫                                    | 106,878    | 平安好医生                                | 62,512    | 养生堂                                   |
|              | Good doctor.com                        |            | Ping'an Doctor.com                   |           | Honyaradoh                            |
| 7            | 膀胱炎有什么症状                               | 322,618    | 尿毒症早期症状                              | 320,342   | 尿路感染症状                                |
|              | What are the manifestation of cystitis |            | Early symptoms of uremia             |           | Symptom of UTI                        |
| 8            | 血小板                                    | 24,046     | 肌酐正常值                                | 15,186    | 妇科检查                                  |
|              | platelet                               |            | Normal range or creatine             |           | Gynecology exam                       |
| 9            | 女性尿道感染能自愈吗                             | 77,960     | 肾积水严重吗                               | 8,206     | 脑血栓后遗症                                |
|              | Is female UTI self-healing             |            | Is hydronephrosis server             |           | cerebral thrombosis sequel            |
| 10           | NG                                     |            |                                      |           |                                       |
|              | NG                                     |            |                                      |           |                                       |
| 11           | 夜尿多是怎么回事                               | 8,796      | 肾气不足的症状                              | 3,484     |                                       |
|              | Why is nocturia                        |            | Symptom of insufficient Qi in kidney |           |                                       |
| 12           | 肾蕨                                     | 2,312      | 鳖精                                   | 723       |                                       |
|              | tuberous sword fern rhizome            |            | essence of turtle                    |           |                                       |
| Voiding Pain | 尿频                                     | 1,676,980  | 尿道内刺痛                                | 1,599,580 | 尿频尿急尿不尽                               |
| 1            | Urinary frequency                      |            | Pain in urinary tract                |           | Freuqency,urgency,incomplete emptying |
| 2            | 尿频是怎么回事                                | 4,910,316  | 尿路感染是怎么引起的                           | 2,682,264 | 小便时尿道刺痛是怎么回事                          |
|              | Why is urinary frequency               |            | Why is UTI                           |           | Why urinary tract Pain                |
| 3            | 三金片的功效与作用                              | 5,455,266  | 左氧氟沙星                                | 5,048,482 | 尿路感染吃什么药                              |
|              | Efficacy of Sanjin pill                |            | Levofloxacin                         |           | What medication for UTI               |
| 4            | 前列腺                                    | 767,236    | 耻骨是哪个部位                              | 167,126   | 膀胱                                    |
|              | Prostate                               |            | Position of pubic bone               |           | Bladder                               |
| 5            | 前列腺炎                                   | 2,132,004  | 尿路感染                                 | 1,130,530 | 尿道炎                                   |
|              | Prostatitis                            |            | UTI                                  |           | Urethritis                            |
| 6            | 上海市第一人民医院                              | 10,206     | 云南省第一人民医院                            | 7,694     | 快速问医生                                 |
|              | First hospital of Shanghai city        |            | First hospital of Yunnan province    |           | Doctor quick.com                      |
| 7            | 前列腺炎有什么症状                              | 16,312,850 | 尿毒症早期症状                              | 6,609,454 | 尿道炎症状表现                               |



|    |                                           |           |                                                              |         |                                            |         |
|----|-------------------------------------------|-----------|--------------------------------------------------------------|---------|--------------------------------------------|---------|
|    | Symptoms of prostatitis                   |           | Early symptoms of uremia                                     |         | Symptoms of urinary tract inflammation     |         |
| 8  | 前列腺炎一杯水自测                                 | 62,044    | HCG 值多少是怀孕                                                   | 56,266  | 血常规能检查出什么                                  | 48,576  |
|    | Testing prostatitis with one cup of water |           | HCG value indicating pregnancy                               |         | What can be detected by Blood routine test |         |
| 9  | 女性尿道感染能自愈吗                                | 1,385,942 | 前列腺炎能彻底治愈吗                                                   | 178,722 | 阳痿会自己恢复吗                                   | 52,228  |
|    | Is female UTI self-curing                 |           | Is prostatitis completely curable?                           |         | Is impotence self-recovering               |         |
| 10 | 肾阳虚                                       | 47,044    |                                                              |         |                                            |         |
|    | kidney-Yang deficiency                    |           |                                                              |         |                                            |         |
|    | 肾虚的表现                                     | 251,026   | 肾阳虚和肾阴虚的区别                                                   | 120,592 |                                            |         |
| 11 | Manifestation of kidney deficiency        |           | Difference between kidney Yang deficiency and Yin deficiency |         |                                            |         |
| 12 | 黄芪的功效与作用                                  | 379,838   | 蒲公英                                                          | 184,088 | 白术的功效与作用                                   | 107,080 |
|    | Efficacy of astragalus                    |           | dandelion                                                    |         | Efficacy of atractylodes                   |         |

---
